# Supplementary material for: Development of a thermochromic lateral flow assay to improve sensitivity for dengue virus serotype 2 NS1 detection
Source: Royal Society of Chemistry journal article supplement (doi:10.1039/d3nr01858j), 2023-01-01
Supplement: d3nr01858j1.pdf [file d3nr01858j1.pdf]

## Development of Thermochromic Lateral Flow Assay to Improve Sensitivity for Dengue Virus Serotype 2 NS1 Detection

Thithawat Trakoolwilaiwan,<sup>a,b</sup> Yasuhiro Takeuchi,<sup>c,d</sup> Terence S. Leung,<sup>e</sup> Matej Sebek,<sup>a,b,f</sup> Liudmyla Storozhuk,<sup>a,b</sup> Linh Nguyen,<sup>g</sup> Le Duc Tung<sup>a,b</sup> and Nguyen Thi Kim Thanh<sup>\*a,b</sup>

- Biophysics Group, Department of Physics and Astronomy, University College London, Gower Street, London WC1E 6BT, UK.
- UCL Healthcare Biomagnetics and Nanomaterials Laboratories, 21 Albemarle Street, London W1S 4BS, UK.
- Division of Infection and Immunity, UCL Cruciform Building, University College London, 90 Gower Street, London WC1E 6BT, UK.
- Biotherapeutics and Advanced Therapies, Scientific Research and Innovation, Medicines and Healthcare products regulatory Agency, South Mimms, EN6 3QG, UK.
- Department of Medical Physics and Biomedical Engineering, Malet Place Engineering Building, University College London, London WC1E 6BT, UK.
- Institute of Materials Research and Engineering, Agency for Science, Technology and Research (A\*STAR), 2 Fusionopolis Way, #08-03, Innovis, Singapore 138634, Singapore.
- Division of Biomaterials and Tissue Engineering, UCL Eastman Dental Institute, University College London, 21 University street, London WC1E 6DE, UK.

\* Corresponding email address: ntk.thanh@ucl.ac.uk

### Supplemental information

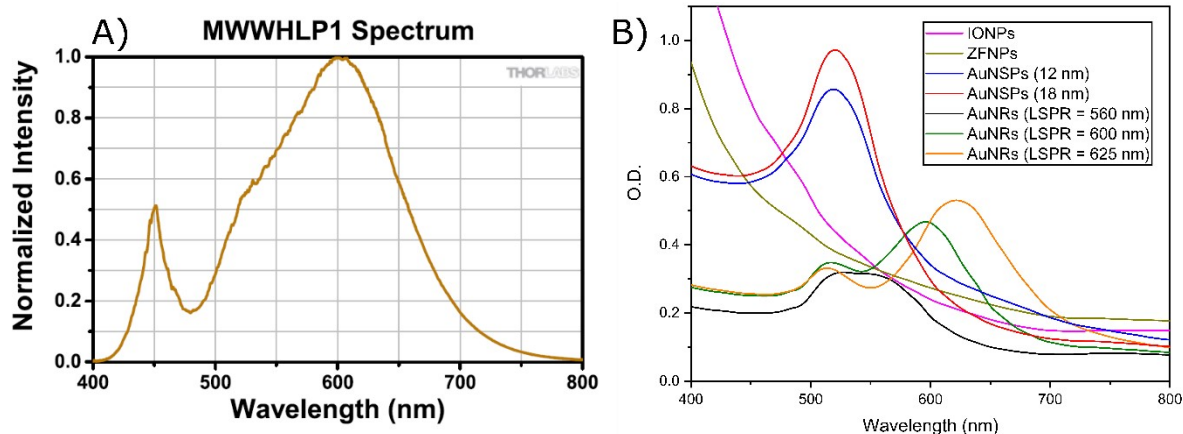

**Fig. S1** A) The spectrum provided by the LED (MWWHL1, Thorlabs, UK) and B) the spectrum absorption of MNPs: IONPs (iron oxide nanoparticles), ZFNPs (zinc ferrite nanoparticles), and plasmonic nanoparticles: AuNSPs (gold nanospheres), and AuNRs (gold nanorods) from 400 and 800 nm. The concentration of all suspensions were adjusted to 0.05 mg/mL.

**Table S1** The sensitivity and limit of detection (LOD) of the typical and colourimetric thermal sensing LFA for DENV2-NS1 detection analysed through different Bayer colour channels.

| Typical of LFA    | Channel | Fitting formula          | Linear range (ng/mL) | R <sup>2</sup> | Sensitivity | S <sub>LOD</sub> | LOD (ng/mL) |
|-------------------|---------|--------------------------|----------------------|----------------|-------------|------------------|-------------|
| Typical LFA       | Red     | $y = 0.04834x + 0.96000$ | 0.78 – 400           | 0.99258        | 0.04834     | 1.1071           | 6.25        |
|                   | Green   | $y = 0.05284x + 0.95851$ | 0.78 – 400           | 0.99588        | 0.05284     | 1.0968           | 6.25        |
|                   | Blue    | $y = 0.04564x + 0.96691$ | 0.78 – 400           | 0.99566        | 0.04564     | 1.1182           | 6.25        |
| Thermochromic LFA | Red     | $y = 0.24536x + 0.84525$ | 0.78 – 12.5          | 0.92498        | 0.24536     | 1.3028           | 3.125       |
|                   | Green   | $y = 0.35898x + 0.75296$ | 0.78 – 400           | 0.98066        | 0.35898     | 1.1332           | 1.5         |
|                   | Blue    | $y = 0.25064x + 0.99854$ | 0.78 – 400           | 0.93857        | 0.25064     | 1.1296           | 1.5         |
